# Supplementary material for: Tau affects P53 function and cell fate during the DNA damage response
Source: PubMed Central journal article supplement (PMC7237658; doi:10.1038/s42003-020-0975-4), 2020-05-19
Supplement: 42003_2020_975_MOESM3_ESM.pdf [file 42003_2020_975_MOESM3_ESM.pdf]

## DNA SEQUENCING DATA FIGURE 1

Microsynth raw sequencing data:

Clone 231A: →all sequences corresponding to three different colonies show WT form of Tau

231A B WT MAEPRQEFVEMEDHAGTYGLGDRKDQGGYTMHQDQEGDTDAGLK...

231A E WT MAEPRQEFVEMEDHAGTYGLGDRKDQGGYTMHQDQEGDTDAGLK...

231A L WT MAEPRQEFVEMEDHAGTYGLGDRKDQGGYTMHQDQEGDTDAGLK...

### >231A B CMV-for

CTGCTTACTGGCTTATCGAAATTAATACGACTCACTATAGGGAGACCCAAGCTTGGTACCGAGCTCGGATCCGTGAAC  
TTTGAACCAGGATGCTGAGCCCCGCCAGGAGTTCTGAAGTGATGGAAGATCACGCTGGGACGTACGGGTTGGGGGA  
CAGGAAAGATCAGGGGGGCTACACCATGCACCAAGACCAAGAGGGTGACACGGACGCTGGCCTGAAAGGTTAGTGG  
ACAGCCATGCACAGCAGGCCAGATCACTGCAAGCCAAGGGGTGGCGGGAACAGTTTGCATCCAGAATTGCAAAGA  
AATTTTAAATACATTATTGTCTTAGACTGTCAGTAAAGTAAAGCCTCATTAAATTTGAGTGGGCCAAGATAACTCAAGCA  
GTGAGATAATGGCCAGACACGGTGGCTCACGCCTGTAATCTCGAGCATGCATCTAGAGGGCCCTATTCTATAGTGTCA  
CCTAAATGCTAGAGCTCGCTGATCAGCCTCGACTGTGCCTTCTAGTTGCCAGCCATCTGTTGTTTGGCCCTCCCCGTGC  
CTTCCTTGACCCTGGAAGGTGCCACTCCCCTGTCCTTTCTAATAAAATGAGGAAATTGCATCGCATTGTCTGAGTAG  
GTGTCATTCTATTCTGGGGGGTGGGGTGGGGCAGGACAGCAAGGGGGAGGATTGGGAAGACAATAGCAGGCATGC  
TGGGGATGCGGTGGGCTCTATGGCTTCTGAGGCGAAAGAACCAGCTGGGGCTCTAGGGGTATCCCCACGCGCCC  
TGTCAGCGCGCATTAAAGCGCGGGGTGTGGTGGTTACGCGCAGCGGGACCGSTAMACTTGCCAGCGCCCTAGCGC  
CCGCTCCTTCACTTACTTCCCTTCTTCTCGCCACGTTGCGCGGCTTCCCCGACAAGCT

### >231A E CMV-for

AGAGCTCTCTGGCTAACTAGAGAACCCACTGCTTACTGGCTTATCGAAATTAATACGACTCACTATAGGGAGACCCA  
GCTTGGTACCGAGCTCGGATCCGTGAACTTTGAACCAGGATGCTGAGCCCCGCCAGGAGTTCTGAAGTGATGGAAGA  
TCAGCTGGGACGTACGGGTTGGGGGACAGGAAAGATCAGGGGGGCTACACCATGCACCAAGACCAAGAGGGTGA  
CACGGACGCTGGCCTGAAAGGTTAGTGACAGCCATGCACAGCAGGCCAGATCACTGCAAGCCAAGGGGTGGCGG  
GAACAGTTTGCATCCAGAATTGCAAAGAAATTTTAAATACATTATTGTCTTAGACTGTCAGTAAAGTAAAGCCTCATT  
ATTTGAGTGGGCCAAGATAACTCAAGCAGTGAGATAATGGCCAGACACGGTGGCTCACGCCTGTAATCTCGAGCATG  
CATCTAGAGGGCCCTATTCTATAGTGTACCTAAATGCTAGAGCTCGCTGATCAGCCTCGACTGTGCCTTCTAGTTGCC  
AGCCATCTGTTGTTTGGCCCTCCCCGTGCCTTCTTGACCCTGGAAGGTGCCACTCCCCTGTCCTTTCTAATAAAAT  
GAGGAAATTGCATCGCATTGTCTGAGTAGGTGTCATTCTATTCTGGGGGGTGGGGTGGGGCAGGACAGCAAGGGGG  
AGGATTGGGAAGACAATAGCAGGCATGCTGGGGATGCGGTGGGCTCTATGGCTTCTGAGGCGGAAAGAACCAGCTG  
GGGCTCTAGGGGGTATCCCCACGCGCCCTGTAGCGCGCATTAAACCGCGGGGTGTGGTGGTTACTCGCAGCGTGA  
CCGCTACACTTGCCAGCGCCCTAGCGCCGCTCCTTTCTGCTTCTTCCCTTCTTCTCGCCACGTTGCGCGGCTTCCCC  
TCAAGCTCTAAATCGGGGGCTCCCTTTWAGGGTTCCGATTTAGTGCT

### >231A L CMV-for

AGAGAACCCACTGCTTACTGGCTTATCGAAATTAATACGACTCACTATAGGGAGACCCAAGCTTGGTACCGAGCTCGG  
ATCCGTGAACTTTGAACCAGGATGCTGAGCCCCGCCAGGAGTTCTGAAGTGATGGAAGATCACGCTGGGACGTACG  
GGTTGGGGGACAGGAAAGATCAGGGGGGCTACACCATGCACCAAGACCAAGAGGGTGACACGGACGCTGGCCTGA  
AAGGTTAGTGACAGCCATGCACAGCAGGCCAGATCACTGCAAGCCAAGGGGTGGCGGGAACAGTTTGCATCCAG  
AATTGCAAAGAAATTTTAAATACATTATTGTCTTAGACTGTCAGTAAAGTAAAGCCTCATTAAATTTGAGTGGGCCAAGA

TAACTCAAGCAGTGAGATAATGGCCAGACACGGTGGCTCACGCCTGTAATCTCGAGCATGCATCTAGAGGGCCCTATT  
CTATAGTGTCACCTAAATGCTAGAGCTCGCTGATCAGCCTCGACTGTGCCTTCTAGTTGCCAGCCATCTGTTGTTTGCCC  
CTCCCCGTGCCTTCCTTGACCCTGGAAGGTGCCACTCCCCTGTCCTTTCCTAATAAAATGAGGAAATTGCATCGCATT  
GTCTGAGTAGGTGTCATTCTATTCTGGGGGGTGGGGTGGGGCAGGACAGCAAGGGGGAGGATTGGGAAGACAATA  
GCAGGCATGCTGGGGATGCGGTGGGCTCTATGGCTTCTGAGGCGGAAAGAACCAGCTGGGGCTCTAGGGGGTATCC  
CCACGCGCCCTGTAGCGGCGCATTAAAGCGCGGCGGGTGTGGTGGTTACGCGCAGCGTGACCGCTACACTTGCCAGCG  
CCCTAGCGCCCGCTCCTTCGCTTTCCTCCCTTCCTTCTCGCCACGTTCCGCGGCTTCCCCGTCAAGCTCTAAATCGGG  
GGCTCCCTTAGGGTCCGATTTAGTGCTTTACGGCACCTCGACCCCCAAAACTTGAATAGGGGTGATGGTTCMCGT  
AGTGGGCCATCGCCCTGATAGACGGTTTTTCCCCCTT

Clone 231K: →sequences corresponding to two different colonies

231K A 1 bp insertion MAEPRQEFVEMEDHAGTYGVGGQERSGGLHHAPRPRGstopcodon

231K L 5bp deletion MAEPRQEFVEMEDHAGTYGGQERSGGLHHAPRPRGstopcodon

**>231K A\_CMV-for**

CTCTCTGGCTAACTAGAGAACCCACTGCTTACTGGCTTATCGAAATTAATACGACTCACTATAGGGAGACCCAAGCTTG  
GTACCGAGCTCGGATCCGTGAACTTTGAACCCAGGATGGCTGAGCCCCGCCAGGAGTTTCAAGTGATGGAAGATCACG  
CTGGGACGTACGGGGTGGGGGACAGGAAAGATCAGGGGGGCTACACCATGCACCAAGACCAAGAGGGTGAACACG  
GACGCTGGCCTGAAAGGTTAGTGGACAGCCATGCACAGCAGGCCAGATCACTGCAAGCCAAGGGGTGGCGGGAAC  
AGTTTGCATCCAGAATTGCAAAGAAATTTAAATACATTATTGTCTTAGACTGTCAGTAAAGTAAAGCCTCATTAAATTT  
GAGTGGGCCAAGATAACTCAAGCAGTGAGATAATGGCCAGACACGGTGGCTCACGCCTGTAATCTCGAGCATGCATC  
TAGAGGGCCCTATTCTATAGTGTACCTAAATGCTAGAGCTCGCTGATCAGCCTCGACTGTGCCTTCTAGTTGCCAGCC  
ATCTGTTGTTTGGCCCTCCCCCGTGCCTTCCTTGACCCTGGAAGGTGCCACTCCCCTGTCCTTTCCTAATAAAAATGAGG  
AAATTGCATCGCATTGTCTGAGTAGGTGTCATTCTATTCTGGGGGTGGGGTGGGGCAGGACAGCAAGGGGGAGGA  
TTGGGAAGACAATAGCAGGCATGCTGGGGATGCGGTGGGCTCTATGGCTTCTGAGGCGGAAAGAACCAGCTGGGGC  
TCTAGGGGGTATCCCCACGCGCCCTGTAGCGGCGCATTAAAGCGCGGCGGGTGTGGTGGTTACGCGCAGCGTGACCGC  
TACACTTGCCAGCGCCCTAGCGCCCGCTCCTTTCGCTTCTCCCTTCCTTCTCGCCACGTTCCCGGCTTCCCCGTCA  
AGCTCTAAATCGGGGGCTCCCTTATAGGGTCCGATTTAGTGCTTACGGCACCTCGACCCCAAAAACCTTGATTAGGGT  
GATGGTTCACGTAGTGGGCCATCGCCCTGATAGACGGTTTTTCGCCCTTGACGTTGGAGTCCACGTTCTTTAAAWART  
GGACTCTGTTCCAAACTGGAACAAMMCTCAACCCTATCYCGGTCTATTCTTTGATTTWWAAGGGATTTTGCCNATT  
TCGGCCTATTGGTTAAAAATNRRCTGATTTA

**>231K L\_CMV-for**

GAGCTCTCTGGCTAACTAGAGAACCCACTGCTTACTGGCTTATCGAAATTAATACGACTCACTATAGGGAGACCCAAG  
CTTGGTACCGAGCTCGGATCCGTGAACTTTGAACCCAGGATGGCTGAGCCCCGCCAGGAGTTTCAAGTGATGGAAGAT  
CACGCTGGGACGTACGGGGGACAGGAAAGATCAGGGGGGCTACACCATGCACCAAGACCAAGAGGGTGAACACGGA  
CGCTGGCCTGAAAGGTTAGTGGACAGCCATGCACAGCAGGCCAGATCACTGCAAGCCAAGGGGTGGCGGGAACAG  
TTTGCATCCAGAATTGCAAAGAAATTTAAATACATTATTGTCTTAGACTGTCAGTAAAGTAAAGCCTCATTAAATTTGA  
GTGGGCCAAGATAACTCAAGCAGTGAGATAATGGCCAGACACGGTGGCTCACGCCTGTAATCTCGAGCATGCATCTA  
GAGGGCCCTATTCTATAGTGTACCTAAATGCTAGAGCTCGCTGATCAGCCTCGACTGTGCCTTCTAGTTGCCAGCCAT  
CTGTTGTTTGGCCCTCCCCCGTGCCTTCCTTGACCCTGGAAGGTGCCACTCCCCTGTCCTTTCCTAATAAAAATGAGGAA  
ATTGCATCGCATTGTCTGAGTAGGTGTCATTCTATTCTGGGGGTGGGGTGGGGCAGGACAGCAAGGGGGAGGATT  
GGGAAGACAATAGCAGGCATGCTGGGGATGCGGTGGGCTCTATGGCTTCTGAGGCGGAAAGAACCAGCTGGGGCTC  
TAGGGGGTATCCCCACGCGCCCTGTAGCGGCGCATTAAAGCGCGGCGGGTGTGGTGGTTACGCGCAGCGTGACCGCT  
ACACTTGCCAGCGCCCTAGCGCCCGCTCCTTTCGCTTCTCCCTTCCTTCTCGCCACGTTCCCGGCTTCCCCGTCAA  
GCTCTAAATCGGGGGCTCCCTTATAGGGTCCGATTTAGTGCTTACGGCACCTCGACCCCAAAAACCTTGATTAGGGT  
GATGGTTCACGTAGTGGGCCATCGCCCTGATAGACGGTTTTTCGCCCTTGACGTTGGAGTCCACGTTCTTTAATAGTG  
GACTCTGTTCCAAACTGGAACAAMMCTCAACCCTATCTCGGTCTATTCTTTGATTATAAGGGATTTTGCCG

Clone 232P: → sequences corresponding to four different colonies

232P E big insertion MAEPRQEFEVQKLFNLPSLLLLSstopcodon

232P G 1bp insertion MAEPRQEFADGRSRWDVVRVGGQERSGGLHHAPRPRGstopcodon

232P M big insertion MAEPRQEFEVQKLFNLPSLLLLSstopcodon

232P O 1bp insertion MAEPRQEFADGRSRWDVVRVGGQERSGGLHHAPRPRGstopcodon-

**>232P-E CMV-for**

GCTCTCTGGCTAACTAGAGAACCCACTGCTTACTGGCTTATCGAAATTAATACGACTCACTATAGGGAGACCCAAGCTT  
GGTACCGAGCTCGGATCCGTGAACTTTGAACCAGGATGGCTGAGCCCCGCCAGGAGTTCGAAGTACAGCAAAAATA  
TTCTTAAACCTACCAAGCCTCTACTATCATTATGATAAATTTTATATACCACAGCCAATTTGTTATGTTAAACCAATTCC  
ACAACTTGCCATTTATCTAATTCCAATAATTCTTGTTCACTCTTTCTTGCTGGTTTTGCGATTCTTCAATTAAGGAGT  
GTATTAAGCTGTGTAATTGTTAATTTCTCTGTCCCACTCCATCCAGGTCGTGTGATTCCGATGCTATTGCTTTATTTGTA  
ACCATTATAAGCTGCAATAAACAAGTTGGGGTGGGCGAAGAAGTCCAGCATGAGATCCCCGCGCTGGAGGATCATCC  
AGCCGTGGGGCGGGAGTTCGCCCTGCGCGACCCGGCCGCAACTGCGTGCCTTCGTGGCCGAGGAGCAGGACTG  
ACACGTGCTACGAGATTTGATTCCACCGCCGCTTCTATGAAAGGTTGGGCTTCGGAATCGTTTTCCGGGACGCCGG  
CTGGACGTGGTGTAAATCTTTATATTATGATGGAAGATCACGCTGGGACGTACGGGTTGGGGGACAGGAAAGATCAG  
GGGGGCTACACCATGCACCAAGACCAAGAGGGTGACACGGACGCTGGCCTGAAAGTTAGTGGACAGCCATGCACA  
GCAGGCCAGATCACTGCAAGCCAAGGGGTGGCGGGAACAGTTTGCATCCAGAATTGCAAAGAAATTTAAATACAT  
TATTGTCTTAGACTGTGTAAGTAAAGCCTCATTAAATTTGAGTGGGCCAAGATAACTCAAGCAGTGAGATAATGGC  
CAGACACGGTGGCTCACGCTGTAATCTCGAGCATGCATCTAGAGGGCCCTATTCTATAGTGTACCTAAATGCTAGA  
GCTCGCTGATCAGCCTCGACTGTGCCTTCTAGTTGCCAGCCATCTGTTGTTTGGCCCTCCCCCGTGCCTTCTTGACCCT  
GGAAGGTGCCMCTCCCACTGTCCTTTCCTAATAAAATGAGGAAATTGCATCGCATNGTCTG

**>232P-G CMV-for**

GCTCTCTGGCTAACTAGAGAACCCACTGCTTACTGGCTTATCGAAATTAATACGACTCACTATAGGGAGACCCAAGCTT  
GGTACCGAGCTCGGATCCGTGAACTTTGAACCAGGATGGCTGAGCCCCGCCAGGAGTTCGAAGCTGATGGAAGATCA  
CGCTGGGACGTACGGGTTGGGGGACAGGAAAGATCAGGGGGGCTACACCATGCACCAAGACCAAGAGGGTGACAC  
GGACGCTGGCCTGAAAGTTAGTGGACAGCCATGCACAGCAGGCCAGATCACTGCAAGCCAAGGGGTGGCGGGAA  
CAGTTTGCATCCAGAATTGCAAAGAAATTTAAATACATTATTGTCTTAGACTGTGTAAGTAAAGCCTCATTAAATTT  
GAGTGGGCCAAGATAACTCAAGCAGTGAGATAATGGCCAGACACGGTGGCTCACGCTGTAATCTCGAGCATGCATC  
TAGAGGGCCCTATTCTATAGTGTACCTAAATGCTAGAGCTCGTGTGATCAGCCTCGACTGTGCCTTCTAGTTGCCAGCC  
ATCTGTTGTTTGGCCCTCCCCCGTGCCTTCTTGACCCTGGAAGGTGCCACTCCCACTGTCCTTTCCTAATAAAATGAGG  
AAATTGCATCGCATTGTCTGAGTAGGTGTCATTCTATTCTGGGGGTGGGGTGGGGCAGGACAGCAAGGGGGAGGA  
TTGGGAAGACAATAGCAGGCATGCTGGGGATGCGGTGGGCTCTATGGCTTCTGAGGCGGAAAGAACCAGCTGGGGC  
TCTAGGGGGTATCCCCACGCGCCCTGTAGCGGCGCATTAAAGCGCGGCGGGTGTGGTGGTTACGCGCAGCGTGACCGC  
TACACTTGCCAGCGCCCTAGCGCCGCTCCTTTGCTTTCTCCCTTCTTTCTCGCCACGTTCCCGGCTTTCCCGTCAA  
GCTCTAAATCGGGGGCTCCCTTTAGGGTTCCGATTTAGTGCTTTACGGCACCTCGACCCAAAACTTGATTAGGGTG  
ATGGTTCACGTAGTGGCCATCGCCCTGATAGACGGTTTTTCGCCCTTTGACGTTGGAGTCCACGTTCTTTAATAGTGG  
ACTCTGTTCCAACTGGAACAACMCTCAACCCTWYTCGGTCTATTCTTTGATTTWTAAGGGAATTTGCCGATTTCCG  
NCCTNTGGTTAAAAATGAGCTGATTTAAMAAAATTTA

**>232P-M CMV-for**

AGCTCTCTGGCTAACTAGAGAACCCACTGCTTACTGGCTTATCGAAATTAATACGACTCACTATAGGGAGACCCAAGCT  
TGGTACCGAGCTCGGATCCGTGAACTTTGAACCAGGATGGCTGAGCCCCGCCAGGAGTTCGAAGTACAGCAAAAAC  
ATTCTTAAACCTACCAAGCCTCCTACTATCATTATGATAATTTTATATACCACAGCCAATTTGTTATGTTAAACCAATTC  
CACAAACTTGCCATTTATCTAATTCCAATAATTCTTGTTTCATTCTTTTCTTGCTGGTTTTGCGATTCTTCAATTAAGGAG  
TGTATTAAGCTTGTGTAATTGTTAATTTCTCTGTCCCACTCCATCCAGGTCGTGTGATTCCGATGCTATTGCTTTATTTGT  
AACCATTATAAGCTGCAATAAACAAGTTGGGGTGGGCGAAGAACTCCAGCATGAGATCCCCGCGCTGGAGGATCATC  
CAGCCGTGGGGGCGGGAGTTTCGCCCTGCGCGACCCGGCCGCAACTGCGTGCACCTCGTGGCCGAGGAGCAGGACT  
GACACGTGCTACGAGATTTGATTCCACCGCCGCTTCTATGAAAGGTTGGGCTTCGGAATCGTTTTCCGGGACGCCG  
GCTGGACGTGGTGTAAATCTTTATATTATGATGGAAGATCACGCTGGGACGTACGGGTTGGGGGACAGGAAAGATCA  
GGGGGGCTACACCATGCACCAAGACCAAGAGGGTGACACGGACGCTGGCCTGAAAGGTTAGTGGACAGCCATGCAC  
AGCAGGCCAGATCACTGCAAGCCAAGGGGTGGCGGGAACAGTTTGCATCCAGAATTGCAAAGAAATTTTAAATACA  
TTATTGTCTTAGACTGTCAGTAAAGTAAAGCCTCATTAAATTTGAGTGGCCAAGATAACTCAAGCAGTGAGATAATGG  
CCAGACACGGTGGCTCACGCCTGTAATCTCGAGCATGCATCTAGAGGGCCCTATTCTATAGTGTACCTAAATGCTAG  
AGCTCGCTGATCAGCCTCGACTGTGCCTTCTAGTTGCCAGCCATCTGTTGTTTGGCCCTCCCCCGTGCCTTCTTGACCC  
TGGAAGGKGCCTCCACTGTCCTTTCTAATAAAATGAGGAAATTGCATCGCATTGTCTGAGTAGGKGTCAATCNAT  
TCTGGGGGGKKGTTGGGGCAGGAMNGCCAAGGGGAAGA

**>232P-O CMV-for**

AGAGCTCTCTGGCTACTAGAGAACCCACTGCTTACTGGCTTATCGAAATTAATACGACTCACTATAGGGAGACCCAAG  
CTTGGTACCGAGCTCGGATCCGTGAACTTTGAACCAGGATGGCTGAGCCCCGCCAGGAGTTCGAAGCTGATGGAAGA  
TCACGCTGGGACGTACGGTTGGGGGACAGGAAAGATCAGGGGGGCTACACCATGCACCAAGACCAAGAGGGTGA  
CACGGACGCTGGCCTGAAAGGTTAGTGGACAGCCATGCACAGCAGGCCAGATCACTGCAAGCCAAGGGGTGGCGG  
GAACAGTTTGCATCCAGAATTGCAAAGAAATTTTAAATACATTATTGTCTTAGACTGTCAGTAAAGTAAAGCCTCATT  
ATTTGAGTGGCCAAGATAACTCAAGCAGTGAGATAATGGCCAGACACGGTGGCTCACGCCTGTAATCTCGAGCATG  
CATCTAGAGGGCCCTATTCTATAGTGTACCTAAATGCTAGAGCTCGCTGATCAGCCTCGACTGTGCCTTCTAGTTGCC  
AGCCATCTGTTGTTTGGCCCTCCCCCGTGCCTTCTTGACCCTGGAAGGTGCCACTCCACTGTCCTTTCTAATAAAAT  
GAGGAAATTGCATCGCATTGTCTGAGTAGGTGTCATTCTATTCTGGGGGGTGGGGTGGGGCAGGACAGCAAGGGGG  
AGGATTGGGAAGACAATAGCAGGCATGCTGGGGATGCGGTGGGCTCTATGGCTTCTGAGGCGGAAAGAACCAGCTG  
GGGCTCTAGGGGGTATCCCCACGCGCCCTGTAGCGGCGCATTAAAGCGCGGCGGGTGTGGTGGTTACGCGCAGCGTG  
ACCGCTACACTTGCCAGCGCCCTAGCGCCCCGCTCCTTTGCTTTCTCCCTTCTCGCCACGTTTCGCCGGCTTTCCC  
CGTCAAGCTCTAAATCGGGGGCTCCCTTTAGGGTCCGATTTAGTCTTTACGGCACCTCGACCCAAAAAACTTGATT  
AGGGTGATGGTTCACGTAGTGGGCCATCGCCCTGATAGACGGTTTTTTCGCCCTTTGACGTTGGAGTCCACGTTCTTTA  
ATAGTGGACTCTTGTCCAACTGGAACAACMCTCAACCCTATCTCGGTCTATTCTTTGATTTWAAGGGATTTTGCCG  
ATTCGCGCANNATTGGTTAAAAAT

## PLASMIDS MAPS AND SEQUENCING

### shRNA SEQUENCE

#### pSME-352 shRNA Tau1881:

Full map:

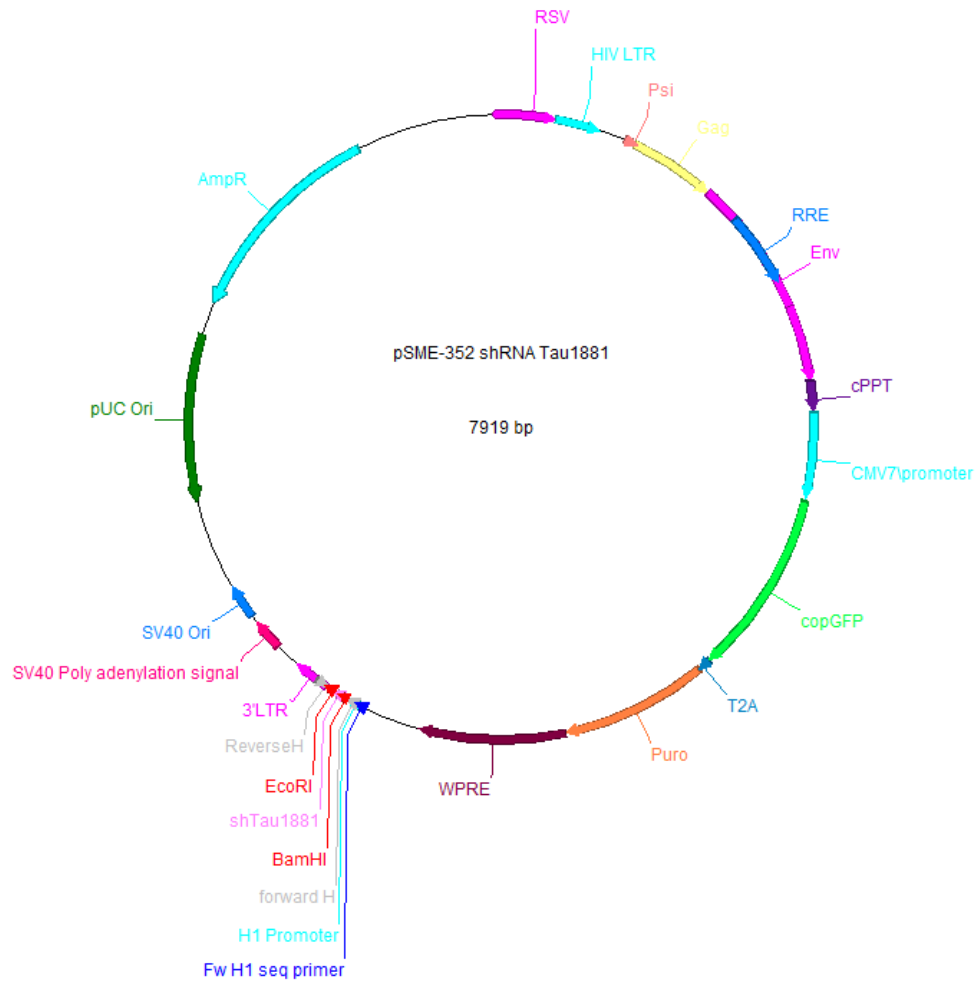

FASTA Sequence information:

>shRNA 1881 A1\_H1 Promoter FWD

```
GATTGGGATCTTATAAGTTCTGTATGAGACCACTTGGATCCTGGTGAACCTCCAAAATCACTTCCTGTCAGATGATTT  
TGGAGGTTCAACATTTTGAATTCTTCGATTCTGCTTTTTGCTTCTACTGGGTCTCTCTGGTTAGACCAGATCTGAGCCT  
GGGAGCTCTCTGGCTAACTAGGGAACCACTGCTTAAGCCTCAATAAAGCTTGCTTGAGTGCTTCAAGTAGTGTGTG  
CCCGTCTGTTGTGTGACTCTGGTAACTAGAGATCCCTCAGACCCCTTCAGTCAGTGTGAAAATCTCTAGCAGTAGTAG  
TTCATGTCATCTTATTATTCAGTATTTATAAATTGCAAAGAAATGAATATCAGAGAGTGAGAGGAACTTGTTTTATTGCA  
GCTTATAATGGTTACAAATAAAGCAATAGCATCACAAATTCACAAATAAAGCATTTTTTTCACTGCATTCTAGTTGTGG  
TTTGTCCAAACTCATCAATGTATCTTATCATGTCTGGCTCTAGCTATCCCGCCCTAACTCCGCCCATCCCGCCCTAACT  
CCGCCAGTCCGCCATTCTCCGCCCATGGCTGACTAATTTTTTTTATTTATGCAGAGGCCGAGGCCGCTCGGCCTC  
TGAGCTATTCCAGAAGTAGTGAGGAGGCTTTTTTGGAGGCCTAGACTTTTGCAGAGACCAAATTCGTAATCATGTCAT
```

AGCTGTTTCCTGTGTGAAATTGTTATCCGCTCACAATCCACACAACATACGAGCCGGAAGCATAAAGTGTAAGCCT  
GGGGTGCCTAATGAGTGAGCTAACTCACATTAATTGCGTTGCGCTCACTGCCCGCTTTCCAGTCGGGAAACCTGTCGT  
GCCAGCTGCATTAATGAATCGGCCAACGCGCGGGGAGAGGCGGTTTTCGTATTGGGCGCTCTCCGCTTCCTCGCTCA  
CTGACTCGCTGCGCTCGGTTCGGCTGCGGCGAGCGGTATCAGCTCACTCAAAGGCGGTAATACGGTTATCCACAG  
AATCAGGGGATAACGCAGGAAAGAACATGTGAGCAAAGGCCAGCAAAGGCCAGGAACCGTAAAAAGGCCGCGT  
TGCTGGCGTTTTTCCATAGGCTCCGCCCCCTGACGAGCATCMCAAAAATCGACSCTCAAGTCAAAGGTGNGAAACCC  
GAMMGACTWWAAGATACCAGGCGTTTTCCCTGGAAGCTCCCYCGKGSSTCYCTGTTCCRACCTGCCSCTTACGGA  
AAC

>shRNA 1881 B1\_H1 Promoter FWD

GGATTGGGATCTTATAAGTTCTGTATGAGACCACTTGGATCCTGGTGAACCTCCAAAATCACTTCCTGTGAGATGATT  
TTGGAGGTTACCATTTTTGAATTCTTCGATTCTGCTTTTTGCTTCTACTGGGTCTCTCTGGTTAGACCAGATCTGAGCC  
TGGGAGCTCTCTGGCTAACTAGGGAACCCACTGCTTAAGCCTCAATAAAGCTTGCCTTGAGTGCTTCAAGTAGTGTGT  
GCCCCGTCTGTTGTGTGACTCTGGTAACTAGAGATCCCTCAGACCCTTTCAGTCAGTGTGGAAAATCTCTAGCAGTAGTA  
GTTTCATGTCATCTTATTATTAGTATTTATAACTTGCAAAGAAATGAATATCAGAGAGTGAGAGGAACTTGTTTATTGC  
AGCTTATAATGGTTACAAATAAAGCAATAGCATCACAAATTTACAAATAAAGCATTTTTTTTCACTGCATTCTAGTTGTG  
GTTTGTCCAAACTCATCAATGTATCTTATCATGTCTGGCTTAGCTATCCCGCCCCTAACTCCGCCATCCCGCCCCTAA  
CTCCGCCAGTCCGCCATTCTCCGCCCATGGCTGACTAATTTTTTTTATTTATGCAGAGGCCGAGGCCGCTCGGCC  
TCTGAGCTATTCCAGAAGTAGTGAGGAGGCTTTTTTGGAGGCCTAGACTTTTGCAGAGACCAAATTCGTAATCATGTC  
ATAGCTGTTTCCTGTGTGAAATTGTTATCCGCTCACAATCCACACAACATACGAGCCGGAAGCATAAAGTGTAAGCC  
TGGGGTGCCTAATGAGTGAGCTAACTCACATTAATTGCGTTGCGCTCACTGCCCGCTTTCCAGTCGGGAAACCTGTCG  
TGCCAGCTGCATTAATGAATCGGCCAACGCGCGGGGAGAGGCGGTTTTCGTATTGGGCGCTCTCCGCTTCCTCGCTC  
ACTGACTCGCTGCGCTCGGTCGTTTCGGCTGCGGCGAGCGGTATCAGCTCACTCAAAGGCGGTAATACGGTTATCCACA  
GAATCAGGGGATAACGCAGGAAAGACATGTGAGCAAAGGCCAGCAAAGGCCAGGAACCGTAAAAAGGCCSCGTT  
GCTGGCGTTTTTCCATAGGCTCCGCCCCCTGAC

## pSME-353 shRNA Tau2112

Full map:

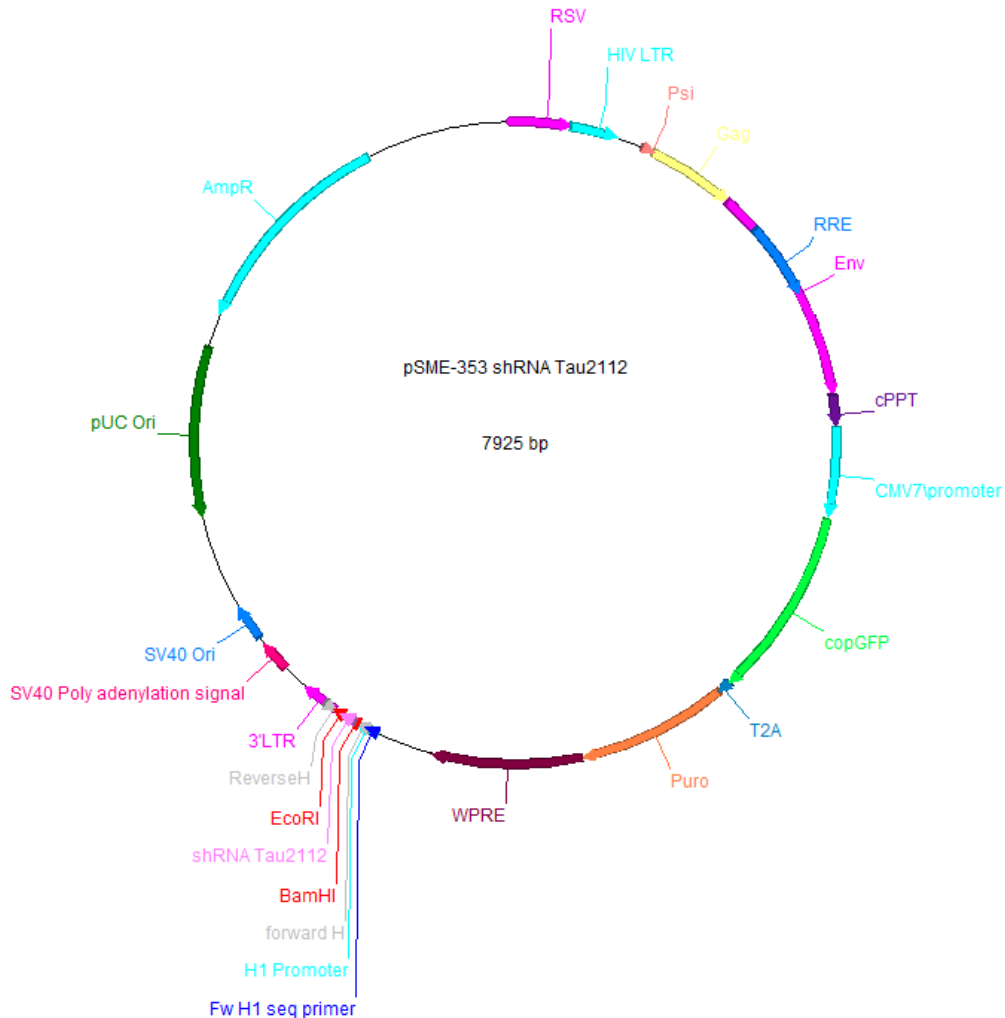

FASTA Sequence information:

>shRNA 2112 A1\_H1 Promoter FWD

```
GATTGGGATCTTATAAGTTCTGTATGAGACCACTTGGATCCAAACTGAGAACCTGAAGCACCAGCTTCCTGTCAGACT  
GGTGCTCAGGTTCTCAGTGTTTTGAATTCTTCGATTCTGCTTTTTGCTTCTACTGGGTCTCTCTGGTTAGACCAGATCT  
GAGCCTGGGAGCTCTCTGGCTAACTAGGGAACCACTGCTTAAGCCTCAATAAAGCTTGCCTTGAGTGCTCAAGTAG  
TGTGTGCCCGTCTGTTGTGTGACTCTGGTAACTAGAGATCCCTCAGACCCTTTCAGTCAGTGTGGAAAATCTCTAGCAG  
TAGTAGTTCATGTCATCTTATTATTCAGTATTTATAACTTGCAAAGAAATGAATATCAGAGAGTGAGAGGAACTTGTTT  
ATTGCAGCTTATAATGGTTACAAATAAAGCAATAGCATCACAAATTCACAAATAAAGCATTTTTTCACTGCATTCTAG  
TTGTGTTTTGTCCAAACTCATCAATGTATCTTATCATGTCTGGCTCTAGCTATCCCGCCCCTAACTCCGCCATCCCGCC  
CCTAACTCCGCCAGTCCGCCATTCTCCGCCCATGGCTGACTAATTTTTTTTATTTATGCAGAGGCCGAGGCCGCT  
CGGCCTCTGAGCTATTCCAGAAGTAGTGAGGAGGCTTTTTGGAGGCCTAGACTTTTGCAGAGACCAAATTCGTAATC  
ATGTCATAGCTGTTTCTGTGTGAAATTGTTATCCGCTCACAATCCACACAACATACGAGCCGGAAGCATAAAGTGTA
```



AAGCCTGGGGTGCCTAATGAGTGAGCTAACTCACATTAATTGCGTTGCGCTCACTGCCCGCTTTCCAGTCGGGAAACC  
TGTCGTGCCAGCTGCATTAATGAATCGGCCAACGCGCGGGGAGAGGCGGTTTTCGTATTGGGCGCTCTCCGCTTCCCT  
CGCTCACTGACTCGCTGCGCTCGGTTCGGCTGCGGCGAGCGGTATCAGCTCACTCAAAGGCGGTAATACGGTTAT  
CCACAGAATCAGGGGATAACGCAGGAAAGAACATGTGAGCAAAAAGGCCAGCAAAAAGGCCAGGAACCGTAAAAAG  
CCSCGTTGCTGGCGTTTTTTCATAGGCTCCGCCCCCTGACGAGCATCMMAAAAANTCGACNCT

>shRNA 2112 B1\_H1 Promoter FWD

GGATTTGGGATCTTATAAGTTCTGTATGAGACCACTTGGATCCAACTGAGAACCTGAAGCACCAGCTTCTGTCAAGAC  
TGGTGCTTCAGGTTCTCAGTGTTTTGAATTCTTCGATTCTGCTTTTTGCTTCTACTGGGTCTCTCTGGTTAGACCAGATC  
TGAGCCTGGGAGCTCTCTGGCTAACTAGGGAACCCACTGCTTAAGCCTCAATAAAGCTTGCCTTGAGTGCTTCAAGTA  
GTGTGTGCCCGTCTGTTGTGTGACTCTGGTAACTAGAGATCCCTCAGACCCTTTCAGTCAGTGTGGAAAATCTCTAGCA  
GTAGTAGTTCATGTCATCTTATTATTTCAGTATTTATAACTTGCAAAGAAATGAATATCAGAGAGTGAGAGGAACTTGTT  
TATTGCAGCTTATAATGGTTACAAATAAAGCAATAGCATCACAAATTTACAAATAAAGCATTTTTTTTCACTGCATTCTA  
GTTGTGGTTTGTCCAACTCATCAATGTATCTTATCATGTCTGGCTCTAGCTATCCCGCCCCTAACTCCGCCCATCCCGC  
CCCTAACTCCGCCAGTTCGCCCATCTCCGCCCATGGCTGACTAATTTTTTTTTATTTATGCAGAGGCCGAGGCCGCC  
TCGGCCTCTGAGCTATTCCAGAAGTAGTGAGGAGGCTTTTTTGGAGGCCTAGACTTTTGCAGAGACCAATTCGTAAT  
CATGTCATAGCTGTTTCCTGTGTGAAATTGTTATCCGCTCACAATTCACACAACATACGAGCCGGAAGCATAAAGTGT  
AAAGCCTGGGGTGCCTAATGAGTGAGCTAACTCACATTAATTGCGTTGCGCTCACTGCCCGCTTTCCAGTCGGGAAAC  
CTGTCGTGCCAGCTGCATTAATGAATCGGCCAACGCGCGGGGAGAGGCGGTTTTCGTATTGGGCGCTCTCCGCTTCC  
TCGCTCACTGACTCGCTGCGCTCGGTTCGGCTGCGGCGAGCGGTATCAGCTCACTCAAAGGCGGTAATACGGTTA  
TCCACAGAATCAGGGGATAACGCAGGAAAGAACATGTGAGCAAAAAGGCCAGCAAAAAGGCCAGGAACCGTAAAAAG  
GCCGCGTTGCTGGCGTTTTTCTAGGCTCCGCCCCCTGACGAGCATCMCAAAAATCGA

**pSME-354 shRNA Tau3127:**

Full map:

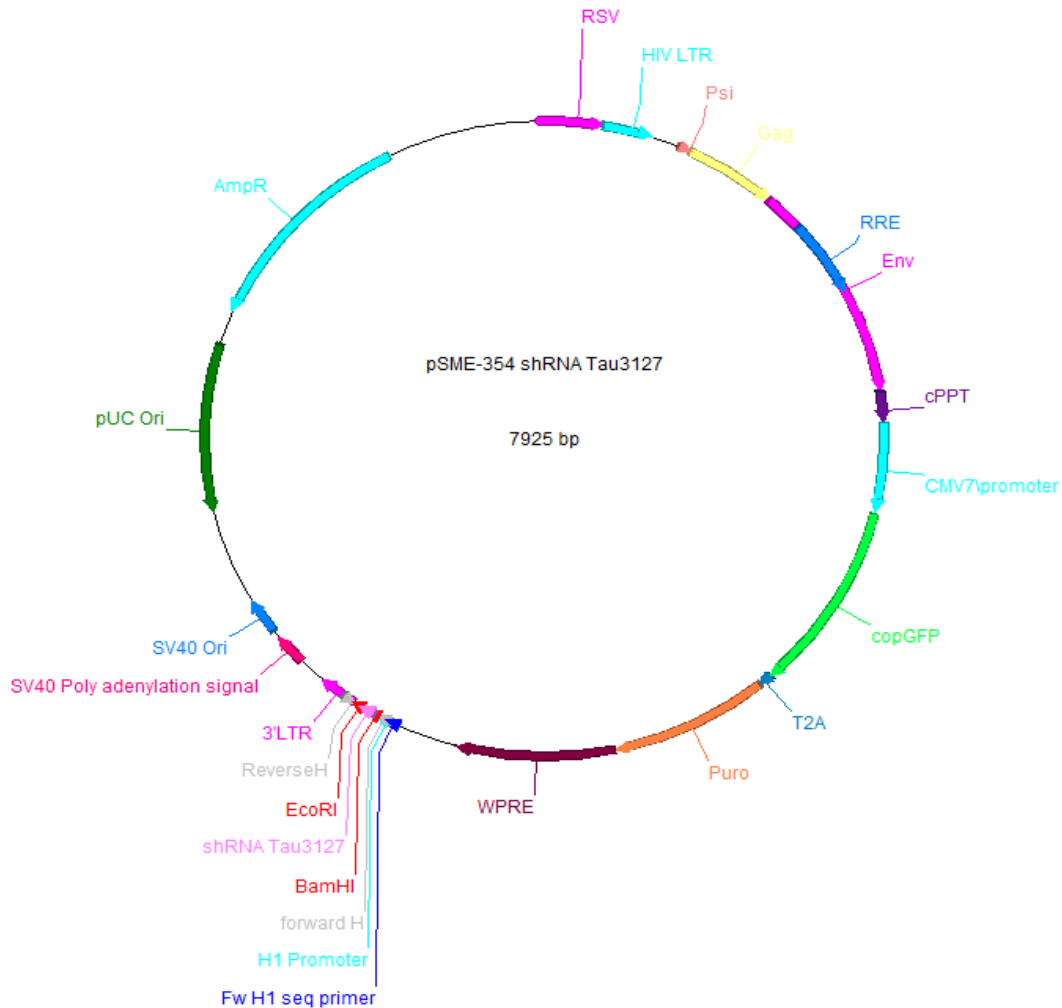

FASTA Sequence information:

>shRNA 3127 A1\_H1 Promoter FWD

```
GGGATCTTATAAGTTCTGTATGAGACCACTTGGATCCAGCAGACGATGTCAACCTTGTGCTTCTGTCTCAGACACAAGG
TTGACATCGTCTGCCTTTTGAATTCTTCGATTCTGCTTTTTGCTTCTACTGGGTCTCTCTGGTTAGACCAGATCTGAGCC
TGGGAGCTCTCTGGCTAACTAGGGAACCCACTGCTTAAGCCTCAATAAAGCTTGCCTTGAGTGCTTCAAGTAGTGTGT
GCCCCTCTGTTGTGTGACTCTGGTAACTAGAGATCCCTCAGACCCTTTCAGTCAGTGTGGAAAATCTCTAGCAGTAGTA
GTTTCATGTCATCTTATTATTAGTATTTATAACTTGCAAAGAAATGAATATCAGAGAGTGAGAGGAACTTGTATTATGC
AGCTTATAATGGTTACAAATAAAGCAATAGCATCACAAATTCACAAATAAAGCATTTTTTTCACTGCATTCTAGTTGTG
GTTTGTCCAAACTCATCAATGTATCTTATCATGTCTGGCTCTAGCTATCCCGCCCTAACTCCGCCCATCCCGCCCTAA
CTCCGCCAGTCCGCCATTCTCCGCCATGGCTGACTAATTTTTTTTATTTATGCAGAGGCCGAGGCCGCTCGGCC
TCTGAGCTATTCCAGAAGTAGTGAGGAGGCTTTTTTGGAGGCCTAGACTTTTGCAGAGACCAAATTCGTAATCATGTC
ATAGCTGTTTCTGTGTGAAATTGTTATCCGCTCACAATCCACACAACATACGAGCCGGAAGCATAAAGTGTAAGCC
```

TGGGGTGCCTAATGAGTGAGCTAACTCACATTAATTGCGTTGCGCTCACTGCCCGCTTCCAGTCGGGAAACCTGTCG  
TGCCAGCTGCATTAATGAATCGGCCAACGCGCGGGGAGAGGCGGTTTTCGTATTGGGCGCTCTCCGCTTCCTCGCTC  
ACTGACTCGCTGCGCTCGGTCGTTTCGGCTGCGGCGAGCGGTATCAGCTCACTCAAAGGCGGTAATACGGTTATCCMC  
AGAATCAGGGGATAACGCAGGAAAGAACATGTGAGCAAAAGGCCAGCAAAAGGCCAGGAACCGTAAAAAGGCCGC  
GTTGCTGGCGTTTTTCCWAAGGCTCCGCCCCCTGACGAGCATCMMAAAATCRACGCTCAAGTCAAAGGNGGCGAA  
ACCCGA

>shRNA 3127 B1\_H1 Promoter FWD

ATTTGGGATCTTATAAGTTCTGTATGAGACCACTTGGATCCAGCAGACGATGTCAACCTTGTGCTTCTGTCAGACACA  
AGGTTGACATCGTCTGCCTTTTTGAATTCTTCGATTCTGCTTTTTGCTTCTACTGGGTCTCTCTGGTTAGACCAGATCTG  
AGCCTGGGAGCTCTCTGGCTAACTAGGGAACCCACTGCTTAAGCCTCAATAAAGCTTGCCTTGAGTGCTTCAAGTAGT  
GTGTGCCCGTCTGTTGTGTGACTCTGGTAACTAGAGATCCCTCAGACCCTTTCAGTCAGTGTGGAAAATCTCTAGCAGT  
AGTAGTTCATGTCATCTTATTATTTCAGTATTTATAACTTGCAAAGAAATGAATATCAGAGAGTGAGAGGAACTTGTTA  
TTGCAGCTTATAATGGTTACAAATAAAGCAATAGCATCACAAATTTACAAATAAAGCATTTTTTTTACTGCATTCTAGT  
TGTGGTTTGTCCAACTCATCAATGTATCTTATCATGTCTGGCTCTAGCTATCCCGCCCCTAACTCCGCCCATCCCGCCC  
CTAACTCCGCCAGTTCGCCCATTTCTCCGCCCATGGCTGACTAATTTTTTTTTATTTATGCAGAGGCCGAGGCCGCCCTC  
GGCCTCTGAGCTATTCCAGAAGTAGTGAGGAGGCTTTTTTGGAGGCCTAGACTTTTGCAGAGACCAAATTCGTAATCA  
TGTCATAGCTGTTTCCTGTGTGAAATTGTTATCCGCTCACAATCCACACAACATACGAGCCGGAAGCATAAAGTGTA  
AGCCTGGGGTGCCTAATGAGTGAGCTAACTCACATTAATTGCGTTGCGCTCACTGCCCGCTTCCAGTCGGGAAACCT  
GTCGTGCCAGCTGCATTAATGAATCGGCCAACGCGCGGGGAGAGGCGGTTTTCGTATTGGGCGCTCTCCGCTTCCTC  
GCTCACTGACTCGCTGCGCTCGGTCGTTTCGGCTGCGGCGAGCGGTATCAGCTCACTCAAAGGCGGTAATACGGTTATC  
CACAGAATCAGGGGATAACGCAGGAAAGAACATGTGAGCAAAAGGCCAGCAAAAGGCCAGGAACCGTAAAAAGGC  
CGCGTTGCTGGCGTTTTTCMNAGGCTCC

**pSME-358 shRNA p53:**

Full map:

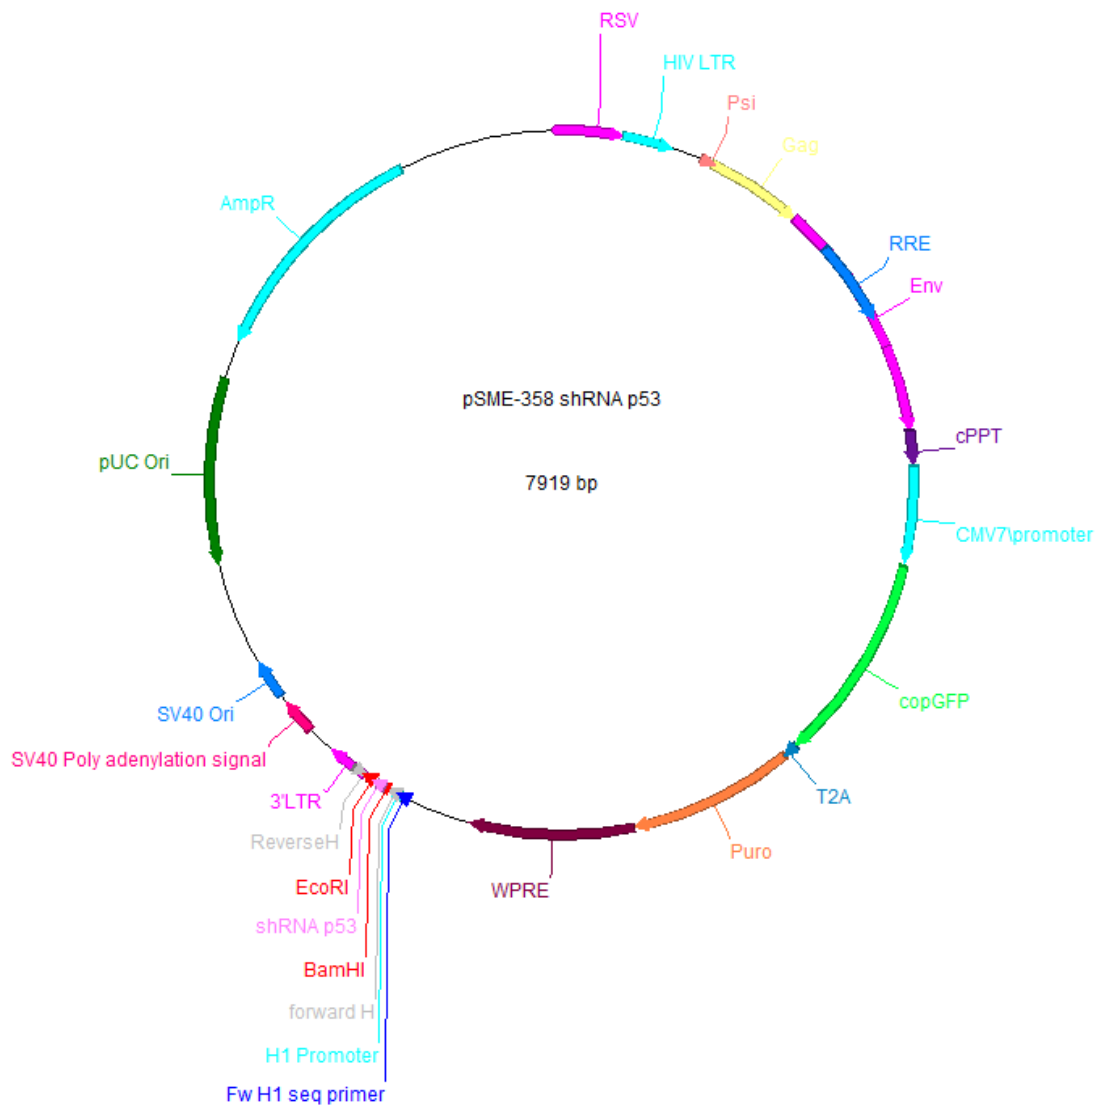

FASTA Sequence information:

>shRNA p53 A\_H1 Promoter FWD

```
NTTGGGATCTTATAAGTTCTGTATGAGACCACTTGGATCCGACTCCAGTGGTAATCTACCTTCTGTCTCAGAGTAGATTA  
CCACTGGAGTCTTTTGAATTCTTCGATTCTGCTTTTTGCTTCTACTGGGTCTCTCTGGTTAGACCAGATCTGAGCCTGG  
GAGCTCTCTGGCTAACTAGGGAACCCACTGCTTAAGCCTCAATAAAGCTTGCCTTGAGTGCTTCAAGTAGTGTGTGCC  
CGTCTGTTGTGTGACTCTGGTAACTAGAGATCCCTCAGACCCTTTCAGTCAGTGTGGAAAATCTCTAGCAGTAGTAGTT  
CATGTCATCTTATTATTCAGTATTTATAAATTGCAAAGAAATGAATATCAGAGAGTGAGAGGAACTTGTTTATTGCAGC  
TTATAATGGTTACAAATAAAGCAATAGCATCACAAATTTACAAATAAAGCATTTTTTTCTACTGCATTCTAGTTGTGGTT  
TGTCAAAATCATCAATGTATCTTATCATGTCTGGCTCTAGCTATCCCGCCCCTAACTCCGCCATCCCGCCCCTAACTCC  
GCCAGTTCGCCCATCTCCGCCCATGGCTGACTAATTTTTTTTTATTTATGCAGAGGCCGAGGCCGCTCGGCCTCT  
GAGCTATCCAGAAGTAGTGAGGAGGCTTTTTGGAGGCCTAGACTTTTGCAGAGACCAAATTCGTAATCATGTCATA  
GCTGTTTCTGTGTGAAATTGTTATCCGCTCACAATCCACACAACATACGAGCCGGAAGCATAAAGTGAAAGCCTG  
GGGTGCCTAATGAGTGAGCTAACTCACATTAATTGCGTTGCGCTCACTGCCCGCTTCCAGTCGGGAAACCTGTCGTG
```

CCAGCTGCATTAATGAATCGGCCAACGCGCGGGGAGAGGCGGTTTGC GTATTGGGCGCTCTCCGCTTCCTCGCTCAC  
TGA CTGCTGCGCTCGGTCGTTCCGGCTGCGGCGAGCGGTATCAGCTCACTCAAAGGCGGTAATACGGTTATCCACAG  
AATCAGGGGATAACGCAGGAAAGAACATGTGAGCAAAGGCCAGCAAAGGCCAGGAACCGTAAAAAGGCCGCGT  
TGCTGGCGTTTTTCCATAGGCTCCGCCCCCTGACGAGCATCMCAAAAATCGACGCTCAAGTCAAAGGTGGCGAAAC  
CCGACAGGACTWTAAGATAACCAGGCGTTTCCCCTGGAAGCTCCCTCGKGSCTYYCTGTTCGAACCTGCCGCTTAC  
CGGAWACCTGTTTCGCCTTTYCCTTCGGGA

>shRNA p53 B\_H1 Promoter FWD

TNTGGGATCTTATAAGTTCTGTATGAGACCACTTGGATCCGACTCCAGTGGTAATCTACCTTCCTGTCAGAGTAGATTA  
CCACTGGAGTCTTTTTGAATTCTTCGATTCTGCTTTTTGCTTCTACTGGGTCTCTCTGGTTAGACCAGATCTGAGCCTGG  
GAGCTCTCTGGCTAACTAGGGAACCCACTGCTTAAGCCTCAATAAAGCTTGCTTGAGTGCTTCAAGTAGTGTGTGCC  
CGTCTGTTGTGACTCTGGTAACTAGAGATCCCTCAGACCCTTTCAGTCAGTGTGGAAAATCTCTAGCAGTAGTAGTT  
CATGTCATCTTATTATTCAGTATTTATAAATTGCAAAGAAATGAATATCAGAGAGTGAGAGGAACTTGTTTATTGCAGC  
TTATAATGGTTACAAATAAAGCAATAGCATCACAAATTTACAAATAAAGCATTTTTTTCACTGCATTCTAGTTGTGGTT  
TGTCCAAACATCAATGTATCTTATCATGTCTGGCTCTAGCTATCCCGCCCCTAACTCCGCCCATCCCGCCCCTAACTCC  
GCCAGTTCGCCCATTCTCCGCCCATGGCTGACTAATTTTTTTTATTTATGCAGAGGCCGAGGCCGCTCGGCCTCT  
GAGCTATCCAGAAGTAGTGAGGAGGCTTTTTTGGAGGCCTAGACTTTTGCAGAGACCAAATTCGTAATCATGTCATA  
GCTGTTTCCTGTGTGAAATTGTTATCCGCTCACAATCCACACAACATACGAGCCGGAAGCATAAAGTGTAAGCCTG  
GGTGCCTAATGAGTGAGCTAACTCACATTAATTGCGTTGCGCTCACTGCCCCGCTTTCAGTCGGGAAACCTGTCGTG  
CCAGCTGCATTAATGAATCGGCCAACGCGCGGGGAGAGGCGGTTTGC GTATTGGGCGCTCTCCGCTTCCTCGCTCAC  
TGA CTGCTGCGCTCGGTCGTTCCGGCTGCGGCGAGCGGTATCAGCTCACTCAAAGGCGGTAATACGGTTATCCACAG  
AATCAGGGGATAACGCAGGAAAGAACATGTGAGCAAAGGCCAGCAAAGGCCAGGAACCGTAAAAAGGCCGCGT  
TGCTGGCGTTTTTCCATAGGCTCCGCCCCCTGACGAGCATCMMAAAAATCGACGCTCAGGTCRRAGGTGGCGAAAC  
CCGACAGGACTWTAAGAWNCCAGGCGTTTCCCCTGGAAGCTCCCTCGTGSCTYYYCTGTTCCNACCTGCCGCTTA  
CGGAANACTGTTTCGCCTTTYCCTTCGGGAA
